# Supplementary material
Source: Springer Nature journal article supplement (https://www.springermedizin.de/resource/supplementary/13550_2013_204_MOESM1_ESM.pdf/9687678)
Supplement: MOESM1 [file 9687678]

| Patient | Medial temporal atrophy | Temporo-parietal hypometabolism | AD-like CSF biomarkers                      | AV-45 mean global SUVR |
|---------|-------------------------|---------------------------------|---------------------------------------------|------------------------|
| n°1     | -                       | +                               | +                                           | 1.50                   |
| n°2     | +                       | -                               | +                                           | 2.23                   |
| n°3     | +                       | +                               | +                                           | 1.51                   |
| n°4     | -                       | +                               | +                                           | 1.42                   |
| n°5     | +                       | -                               | +                                           | 1.08                   |
| n°6     | +                       | +                               | +                                           | 1.54                   |
| n°7     | +                       | +                               | +                                           | 1.47                   |
| n°8     | +                       | +                               | +                                           | 1.32                   |
| n°9     | +                       | -                               | +                                           | 1.02                   |
| n°10    | +                       | -                               | ambiguous (IATI = 0.38 ; P-Tau = 0.48pg/mL) | 1.16                   |
| n°11    | +                       | -                               | +                                           | 1.37                   |
| n°12    | +                       | +                               | NA                                          | 1.68                   |
| n°13    | +                       | +                               | +                                           | 1.04                   |
| n°14    | +                       | +                               | -                                           | 1.24                   |
| n°15    | +                       | -                               | NA                                          | 1.31                   |
| n°16    | -                       | +                               | +                                           | 1.68                   |
| n°17    | +                       | +                               | +                                           | 1.70                   |
| n°18    | +                       | +                               | +                                           | 1.37                   |
| n°19    | -                       | -                               | +                                           | 1.35                   |
| n°20    | +                       | -                               | +                                           | 1.77                   |
| n°21    | -                       | +                               | +                                           | 1.10                   |
| n°22    | +                       | +                               | +                                           | 1.60                   |

| CN subjects | AV-45 mean global SUVR |
|-------------|------------------------|
| n°1         | 1.05                   |
| n°2         | 1.16                   |
| n°3         | 1.09                   |
| n°4         | 1.14                   |
| n°5         | 1.17                   |
| n°6         | 1.35                   |
| n°7         | 1.23                   |
| n°8         | 1.23                   |
| n°9         | 1.16                   |
| n°10        | 1.14                   |
| n°11        | 1.05                   |
| n°12        | 1.21                   |
| n°13        | 1.10                   |
| n°14        | 1.20                   |
| n°15        | 1.16                   |
| n°16        | 1.15                   |
| n°17        | 1.04                   |

**Additional data 1: Individual profiles of patients on inclusion criteria and mean global target-to-cerebellum Standard Uptake Values (SUVR) for both groups.**
